# Supplementary material for: Measurement report: Size-Resolved and Seasonal Variations in Aerosol Hygroscopicity Dominated by Organic Formation and Aging: Insights from a Year-Long Observation in Nanjing
Source: Copernicus journal article supplement (doi:10.5194/egusphere-2025-3186), 2025-08-06
Supplement: Supplementary file 1 [file egusphere-2025-3186-supplement.pdf]

*Supplement of*

## **Measurement report: Size-Resolved and Seasonal Variations in Aerosol Hygroscopicity Dominated by Organic Formation and Aging: Insights from a Year-Long Observation in Nanjing**

5 Junhui Zhang<sup>1</sup>, Yuying Wang<sup>1</sup>, Jialu Xu<sup>1</sup>, Xiaofan Zuo<sup>1</sup>, Chunsong Lu<sup>1</sup>, Bin Zhu<sup>1</sup>, Yuanjian Yang<sup>1</sup>, Xing Yan<sup>2</sup>, Yele Sun<sup>3</sup>

<sup>1</sup>State Key Laboratory of Climate System Prediction and Risk Management/Key Laboratory for Aerosol–Cloud Precipitation of China Meteorological Administration/Special Test Field of National Integrated Meteorological Observation, Nanjing University of Information Science & Technology, Nanjing 210044, China

10 <sup>2</sup>Faculty of Geographical Science, Beijing Normal University, Beijing 100875, China

<sup>3</sup>State Key Laboratory of Atmospheric Environment and Extreme Meteorology, Institute of Atmospheric Physics, Chinese Academy of Sciences, Beijing 100029, China

*Correspondence to:* Yuying Wang (yuyingwang@nuist.edu.cn)

The copyright of individual parts of the supplement might differ from the article licence.

**Table S1. The size-resolved  $\kappa_{\text{mean}}$  during different seasons.**

| Season | $\kappa_{\text{mean}}$ |           |           |           |           |
|--------|------------------------|-----------|-----------|-----------|-----------|
|        | 40 nm                  | 80 nm     | 110 nm    | 150 nm    | 200 nm    |
| Winter | 0.12±0.04              | 0.18±0.05 | 0.20±0.05 | 0.22±0.04 | 0.24±0.05 |
| Spring | 0.14±0.04              | 0.19±0.05 | 0.20±0.04 | 0.22±0.04 | 0.25±0.05 |
| Summer | 0.12±0.04              | 0.15±0.05 | 0.17±0.05 | 0.18±0.05 | 0.21±0.05 |
| Autumn | 0.10±0.04              | 0.13±0.04 | 0.15±0.04 | 0.17±0.05 | 0.20±0.05 |
| Annual | 0.12±0.04              | 0.16±0.05 | 0.18±0.05 | 0.20±0.05 | 0.22±0.06 |

**Table S2. The occurrence frequency of NPF events during different seasons.**

| Season | NPF occurrence frequency |
|--------|--------------------------|
| annual | 10.41 %                  |
| Winter | 6.67 %                   |
| Spring | 20.65 %                  |
| Summer | 3.26 %                   |
| Autumn | 10.99 %                  |

**Table S3. The change in percentage of size-resolved hygroscopicity parameters ( $CV_{\kappa\text{-PDF}}$ ,  $\kappa_{\text{mean}}$ ,  $NF_{\text{NH}}$ ,  $\kappa_{\text{NH}}$ ,  $NF_{\text{LH}}$ ,  $\kappa_{\text{LH}}$ ,  $NF_{\text{MH}}$ ,  $\kappa_{\text{MH}}$ ) during the NPF days compared with the non-NPF days.**

| $D_p(\text{nm})$ | (NPF — non-NPF)/non-NPF × 100 % |                        |                  |                      |                  |                      |                  |                      |
|------------------|---------------------------------|------------------------|------------------|----------------------|------------------|----------------------|------------------|----------------------|
|                  | $CV_{\kappa\text{-PDF}}$        | $\kappa_{\text{mean}}$ | $NF_{\text{NH}}$ | $\kappa_{\text{NH}}$ | $NF_{\text{LH}}$ | $\kappa_{\text{LH}}$ | $NF_{\text{MH}}$ | $\kappa_{\text{MH}}$ |
| 40               | 6.86                            | -6.76                  | 12.11            | -4.50                | -0.63            | -2.40                | -12.68           | -0.37                |
| 80               | 0.39                            | -1.13                  | 4.51             | 3.49                 | 0.04             | -1.12                | -2.00            | 0.61                 |
| 110              | 1.04                            | -3.31                  | 5.24             | 4.36                 | 11.59            | -1.03                | -7.20            | -0.17                |
| 150              | -4.83                           | 2.43                   | -7.88            | -0.85                | -9.09            | 0.35                 | 4.65             | 0.94                 |
| 200              | -11.17                          | 5.07                   | -25.05           | -12.16               | -6.92            | 2.19                 | 5.79             | 0.47                 |

**Table S4. The occurrence frequency of NPF events under the influence of different air masses during spring.**

| Cluster | NPF occurrence frequency |
|---------|--------------------------|
| C1      | 11.16 %                  |
| C2      | 42.44 %                  |
| C3      | 25.00 %                  |

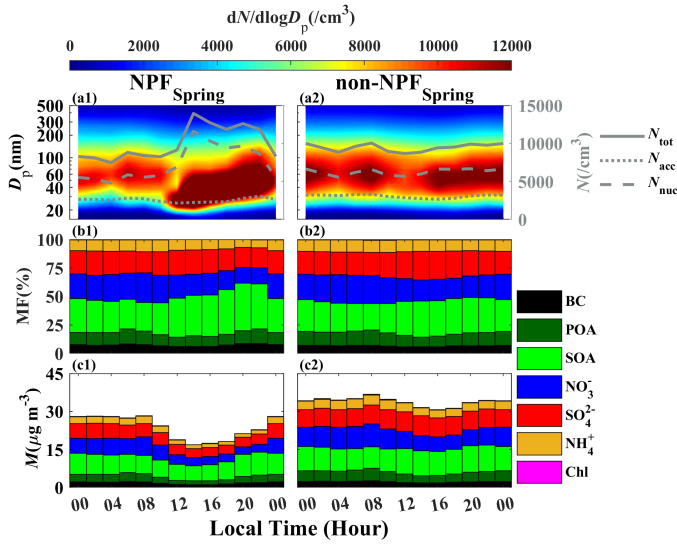

Figure S1. Diurnal variations of (a1, a2) particle number size distributions (PNSD), total particle number concentration ( $N_{\text{tot}}$ ), accumulation-mode particle number concentration ( $N_{\text{acc}}$ ), and nucleation-mode particle number concentration ( $N_{\text{nuc}}$ ), (b1, b2) mass fractions (MF) of aerosol chemical species, and (c1, c2) mass concentrations ( $M$ ) of aerosol chemical species in spring NPF days (NPF<sub>spring</sub>) and spring non-NPF days (non-NPF<sub>spring</sub>).

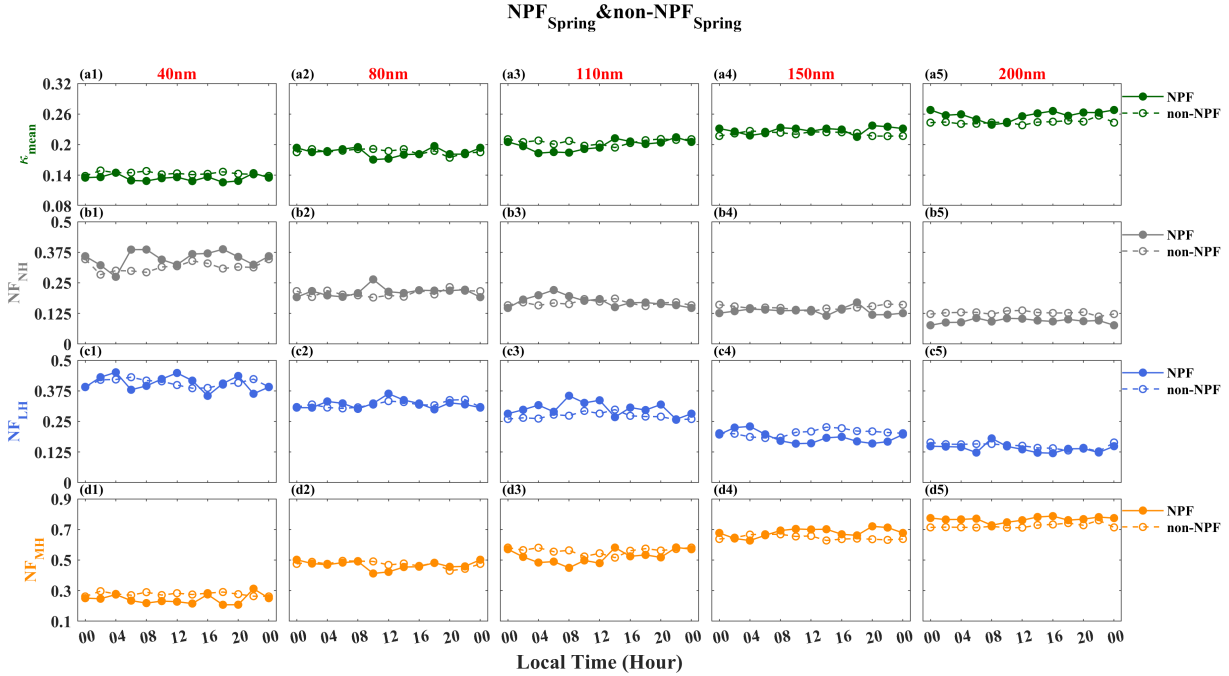

Figure S2. Diurnal variations of the (a1–a5)  $\kappa_{\text{mean}}$ , (b1–b5)  $\text{NF}_{\text{MH}}$ , (c1–c5)  $\text{NF}_{\text{LH}}$ , and (d1–d5)  $\text{NF}_{\text{NH}}$  for different size particles (40–200 nm) in spring NPF days (solid lines with dots) and spring non-NPF days (dashed lines with dots).

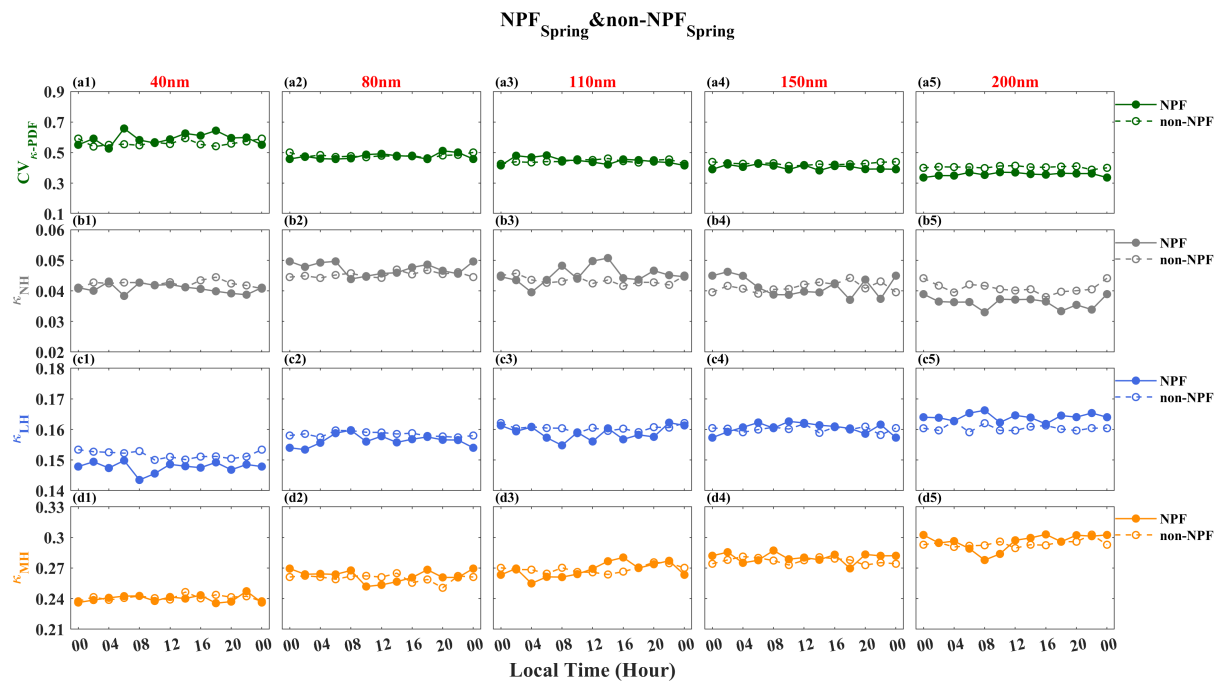

**Figure S3.** Diurnal variations of the (a1–a5)  $CV_{k-PDF}$ , (b1–b5)  $\kappa_{MH}$ , (c1–c5)  $\kappa_{LH}$ , and (d1–d5)  $\kappa_{NH}$  for different size particles (40–200 nm) in spring NPF days (solid lines with dots) and spring non-NPF days (dashed lines with dots).

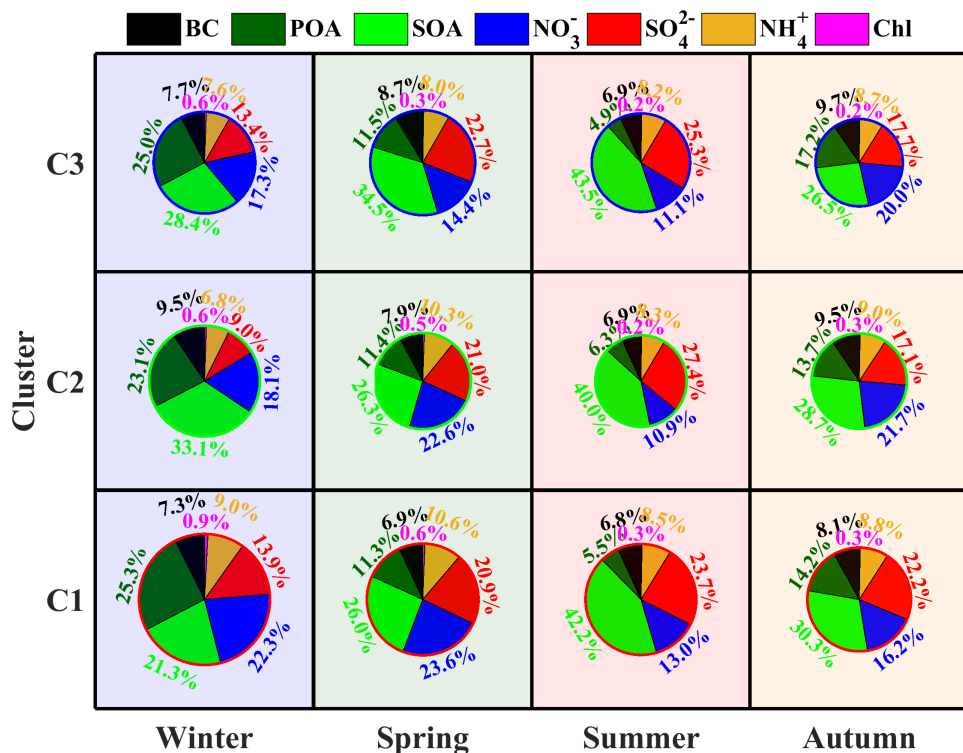

Figure S4. The mass fractions (MF) of aerosol chemical components under the influence of different air masses in different seasons. The size of the pie charts represents the  $\text{PM}_{2.5}$  mass concentration. The border colors of the pie charts indicate the air mass types, i.e., red for Cluster C1, green for Cluster C2, and blue for Cluster C3. The background shading colors represent the seasons, i.e., blue for winter, green for spring, red for summer, orange for autumn.

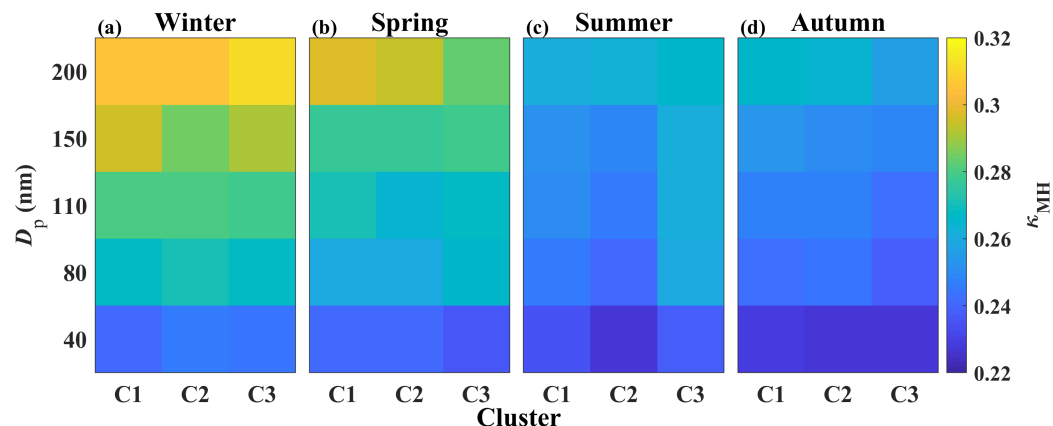

Figure S5. The  $\kappa_{\text{MH}}$  for all size particles (40–200 nm) in the influence of different air masses during different seasons.
