# Supplementary material for: Measurement report: Size-Resolved and Seasonal Variations in Aerosol Hygroscopicity Dominated by Organic Formation and Aging: Insights from a Year-Long Observation in Nanjing
Source: Copernicus journal article supplement (doi:10.5194/egusphere-2025-3186), 2025-08-06
Supplement: Supplementary file [file egusphere-2025-3186-AC1-supplement.pdf]

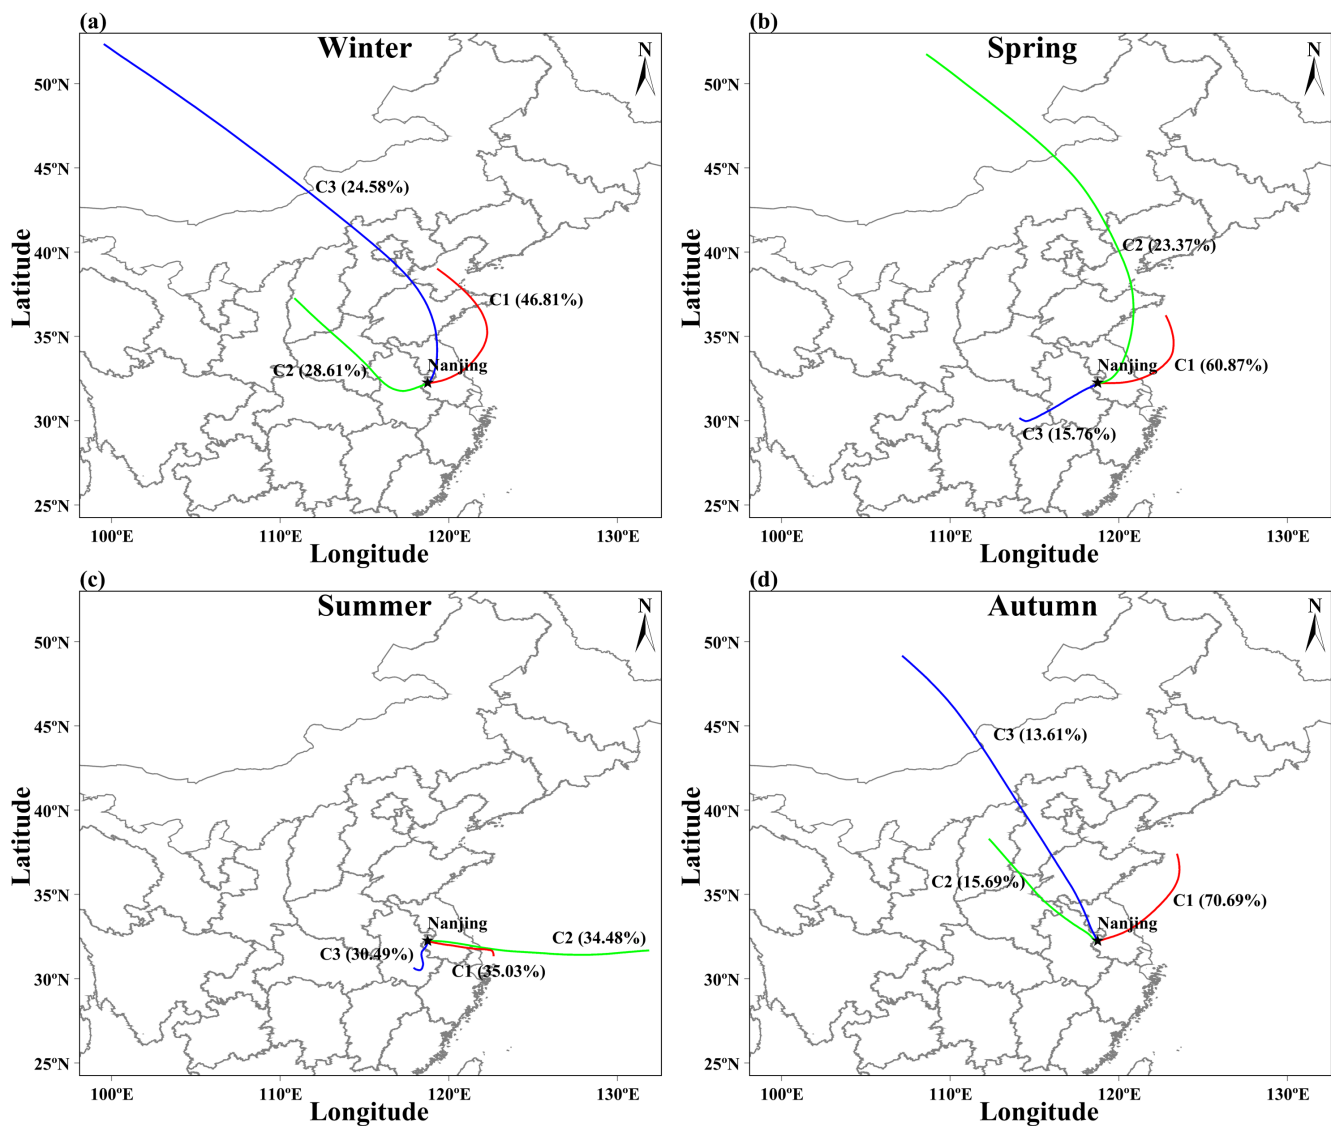

Figure 7. 72-hour air mass backward trajectories at a height of 100 meters corresponding to the cluster analysis during different seasons. The line colors denote different clusters, i.e., red for Cluster C1, green for Cluster C2, and blue for Cluster C3.
